# Supplementary material for: The degradation potential of PET bottles in the marine environment: An ATR-FTIR based approach
Source: PubMed Central journal article supplement (PMC4802224; doi:10.1038/srep23501), 2016-03-22
Supplement: srep23501-s1.pdf [file srep23501-s1.pdf]

1     **The degradation potential of PET bottles in the marine environment: An ATR-**  
2                                    **FTIR based approach.**

3  
4            **C. Ioakeimidis<sup>a,b</sup>, K.N. Fotopoulou<sup>c</sup>, H.K. Karapanagioti<sup>c\*</sup>, M. Geraga<sup>a</sup>,**  
5            **C. Zeri<sup>b</sup>, E. Papathanassiou<sup>b</sup>, F. Galgani<sup>d</sup>, G. Papatheodorou<sup>a</sup>**

6     <sup>a</sup> Laboratory of Marine Geology and Physical Oceanography, Department of Geology, University of  
7     Patras, 26500 Patras, Greece.

8     <sup>b</sup> Institute of Oceanography, Hellenic Centre for Marine Research, 19013 Anavyssos, Greece.

9     <sup>c</sup> Department of Chemistry, University of Patras, 26500 Patras, Greece.

10    <sup>d</sup> Departement Océanographie et Dynamique des Ecosystemes, Institut français de recherche pour  
11    l'exploitation de la mer (Ifremer), Bastia, Corsica, France.

12  
13    \* Corresponding Author. Address: Department of Chemistry, University of Patras, 26500 Patras,  
14    Greece; Tel.: +30 2610 996728; e-mail address: karapanagioti@upatras.gr (H.K. Karapanagioti)

15  
16    **SUPPLEMENTARY INFORMATION**

17  
18    **1. Materials and methods**

19    On the basis of the assessment of marine litter on the seafloor of the Saronikos Gulf  
20    (Aegean Sea – E. Mediterranean) from January 2013 to April 2014, plastic marine  
21    litter items were collected from 70 hauls conducted by commercial bottom-trawl  
22    fisheries in order to be examined in respect to environmental degradation. Plastic  
23    bottles made of polyethylene terephthalate (PET) were collected on condition that the  
24    expiration date was discernible. Eight colorless (1997(a-b), 1998, 1999, 2001, 2008,  
25    2011, 2014) plastic bottles (PETs) were collected. The plastic bottles were sorted  
26    according to their expiration date. The indicated on the plastic bottles expiration date  
27    was used denotative to the time-period that the samples were present in the marine  
28    environment.

29    In the laboratory, samples were rinsed with an electrolyte solution (NaNO<sub>3</sub> 0.1 M) to  
30    remove all sediment compounds, in order to have a clear polymer surface for  
31    investigation. All samples were only handled with laboratory gloves in order to avoid  
32    external contamination.

33    **Attenuated Total Reflection (ATR):** ATR-FTIR was used in order to determine  
34    possible functional groups on the surface of PET, which could be further attributed to  
35    environmental degradation. An ALPHA Platinum ATR-FTIR (Bruker Corporation)

36 with a singly reflection diamond accompanied by the OPUS software was used. For  
37 the PET samples, pieces from both inner and outer part of the bottles were selected  
38 for analysis.

39 **Scanning Electron Microscopy (SEM):** The surface topography, the roughness of  
40 the polymers as well as any organisms inhabiting on the surface of the polymers were  
41 visualized with a JEOL 6300, Scanning Electron Microscope (SEM). The SEM was  
42 equipped with Spectrometers Energy Dispersion X-ray (EDS), Wavelength  
43 Dispersion X-ray (WDS) and Cryotrans. The selected for examination surfaces of the  
44 PET samples were coated with a layer of gold by sputtering using a JEOL, JFC-1100,  
45 ions sputter. Before samples were coated with gold, were rinsed with ethanol solution  
46 in order to avoid any kind of contamination. Since the degraded samples were  
47 heterogeneous, the visualization was repeated at least three times for each sample, to  
48 make sure that a similar image was observed for all degraded samples.  
49 Photomicrographs were taken in various fold magnifications (x40, x270, x250, x1000,  
50 x1600, x5000, x8000, x8500, x35000) depending on the samples.

51

52 2. Supplementary figures

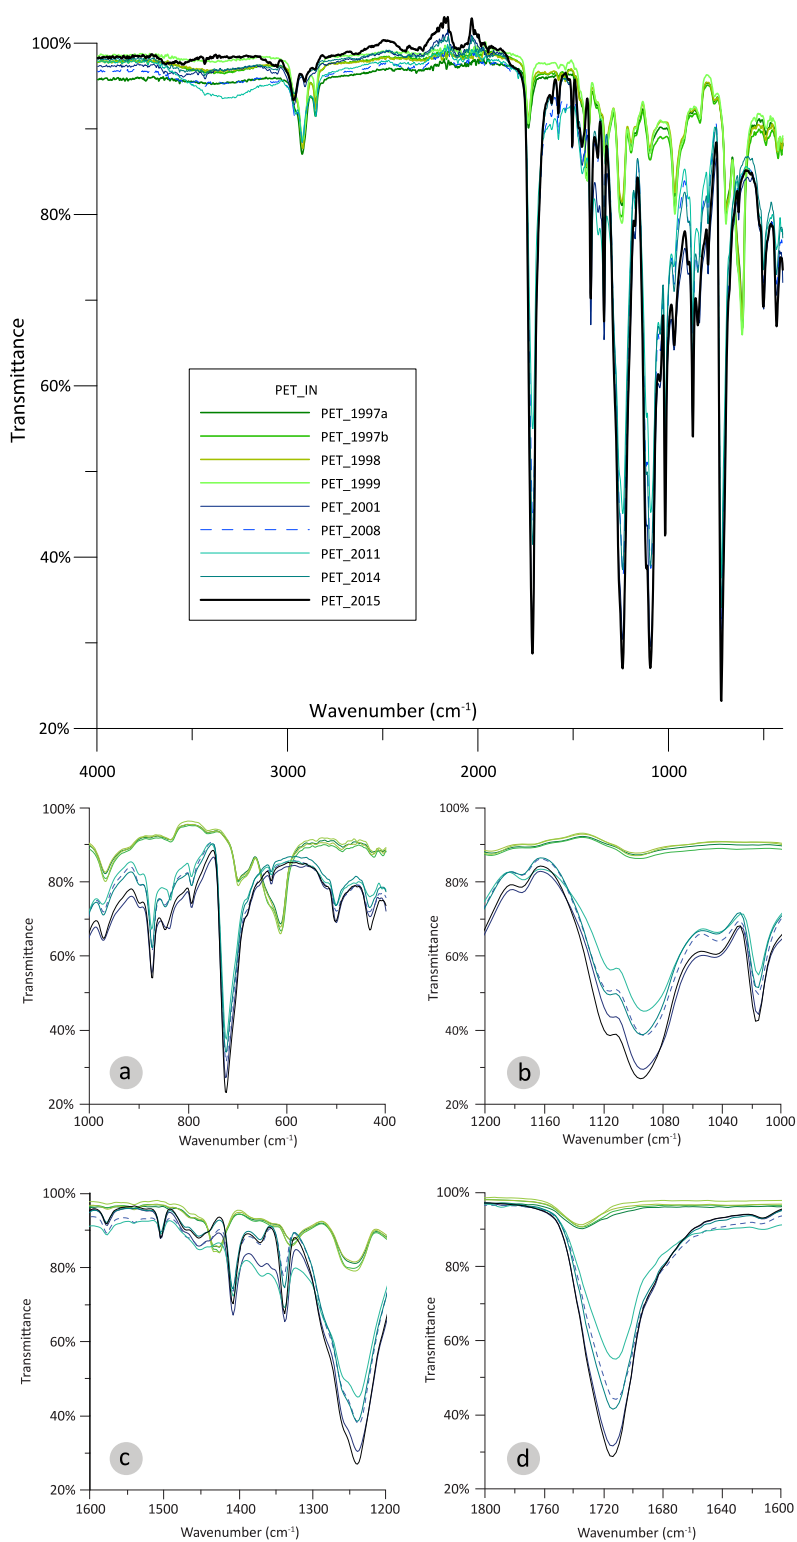

53

54 **Figure S1:** ATR-FTIR comparative spectra of the inner (IN) surface of the degraded  
 55 PETs (1997(a-b), 1998, 1999, 2001, 2008, 2011, 2014) compared with a virgin (V)  
 56 sample. For better visualization, enlarged excerpts of the ATR-FTIR comparative  
 57 spectra are given at wavenumbers (a) 400-1000, (b) 1000-1200, (c) 1200-1600, (d)  
 58 1600-1800  $\text{cm}^{-1}$ .

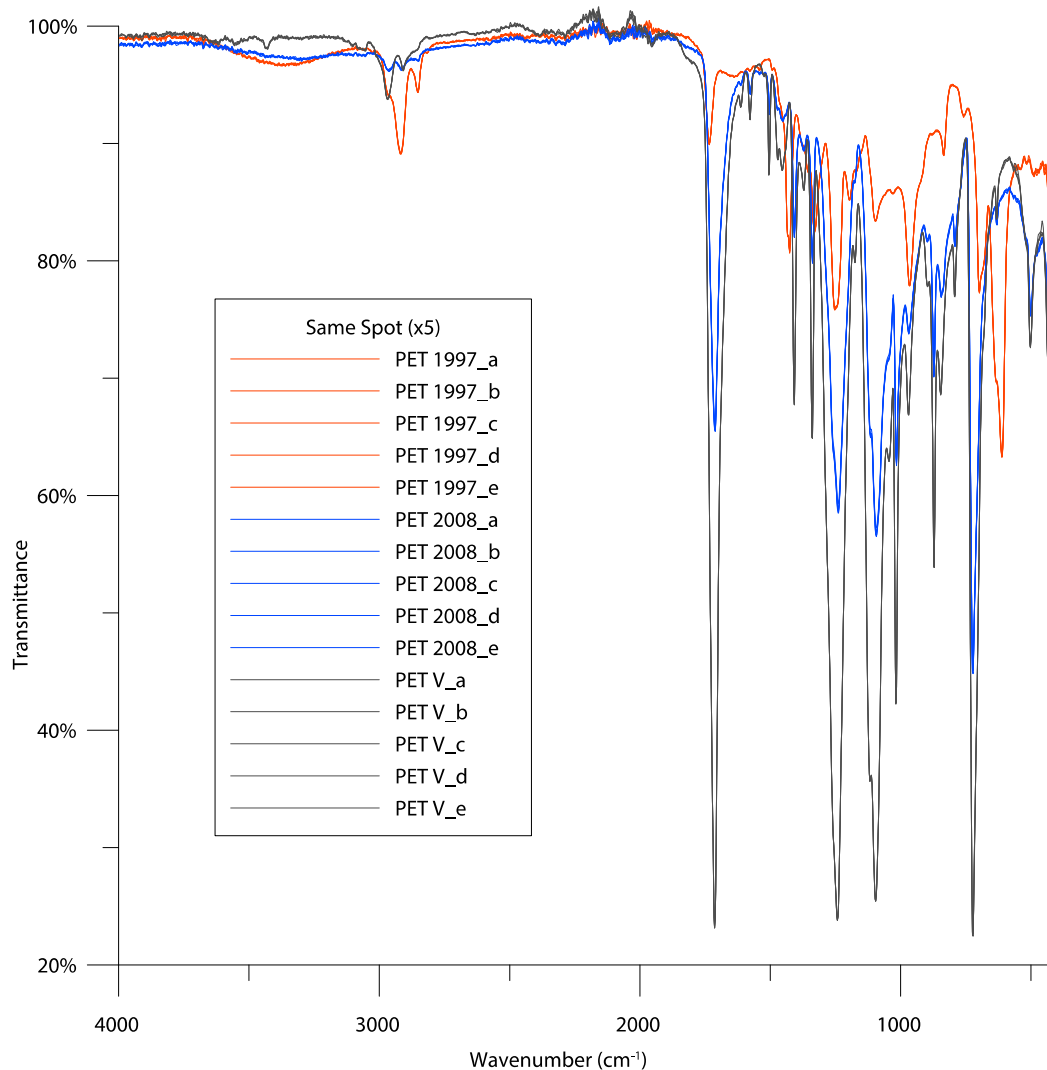

59  
 60 **Figure S2:** Multiple (x5) FTIR-ATR readings for the same examined spot for the  
 61 different PET bottles (*1997, 2008 and V*) corresponding in the different groupings  
 62 (Old – New – V), have been plotted into a single graph in order to visually illustrate  
 63 whether there is an alteration (i.e. decrease in band intensity) between the readings or  
 64 not.  
 65

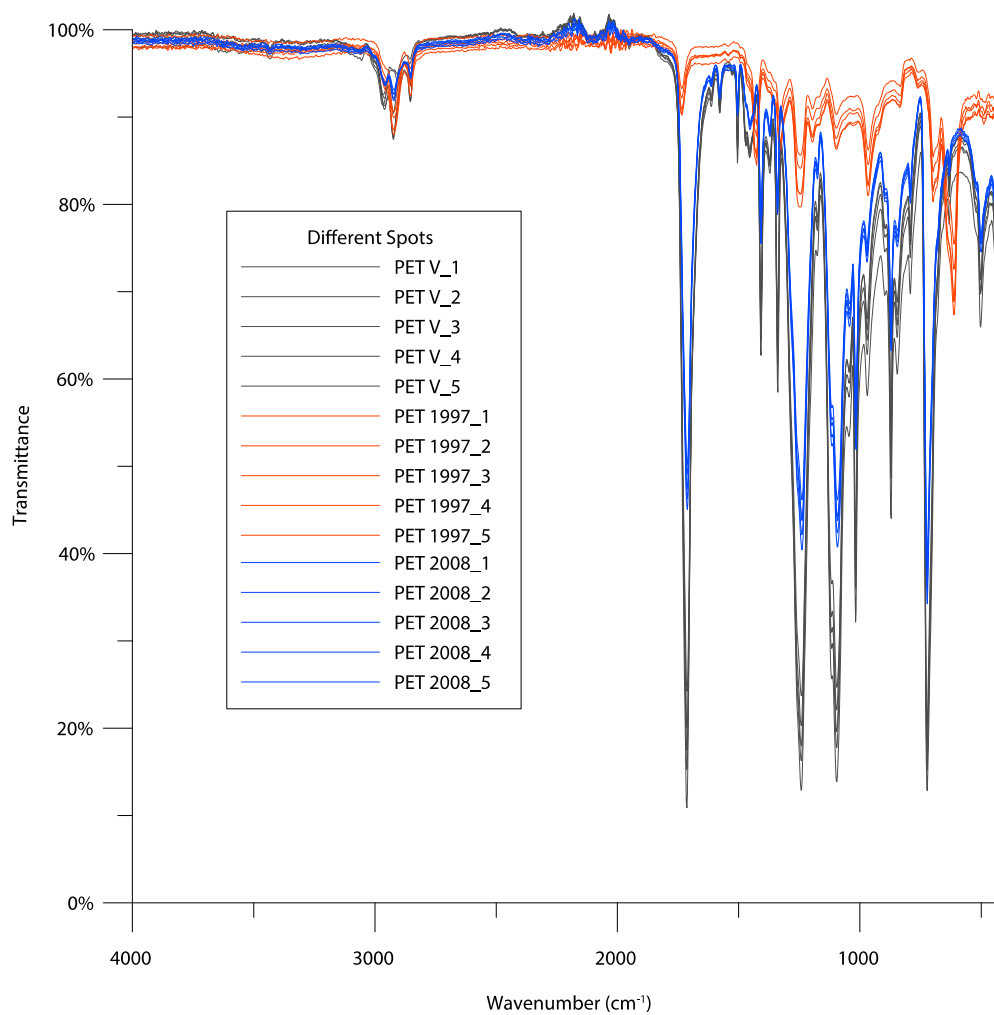

66  
 67 **Figure S3:** Different FTIR-ATR reading for different spots (#5) for the different PET  
 68 bottles (1997, 2008 and V) corresponding in the different groupings (Old – New – V),  
 69 have been plotted into a single graph in order to visually illustrate whether there is an  
 70 alteration (i.e. decrease in band intensity) between the readings or not.

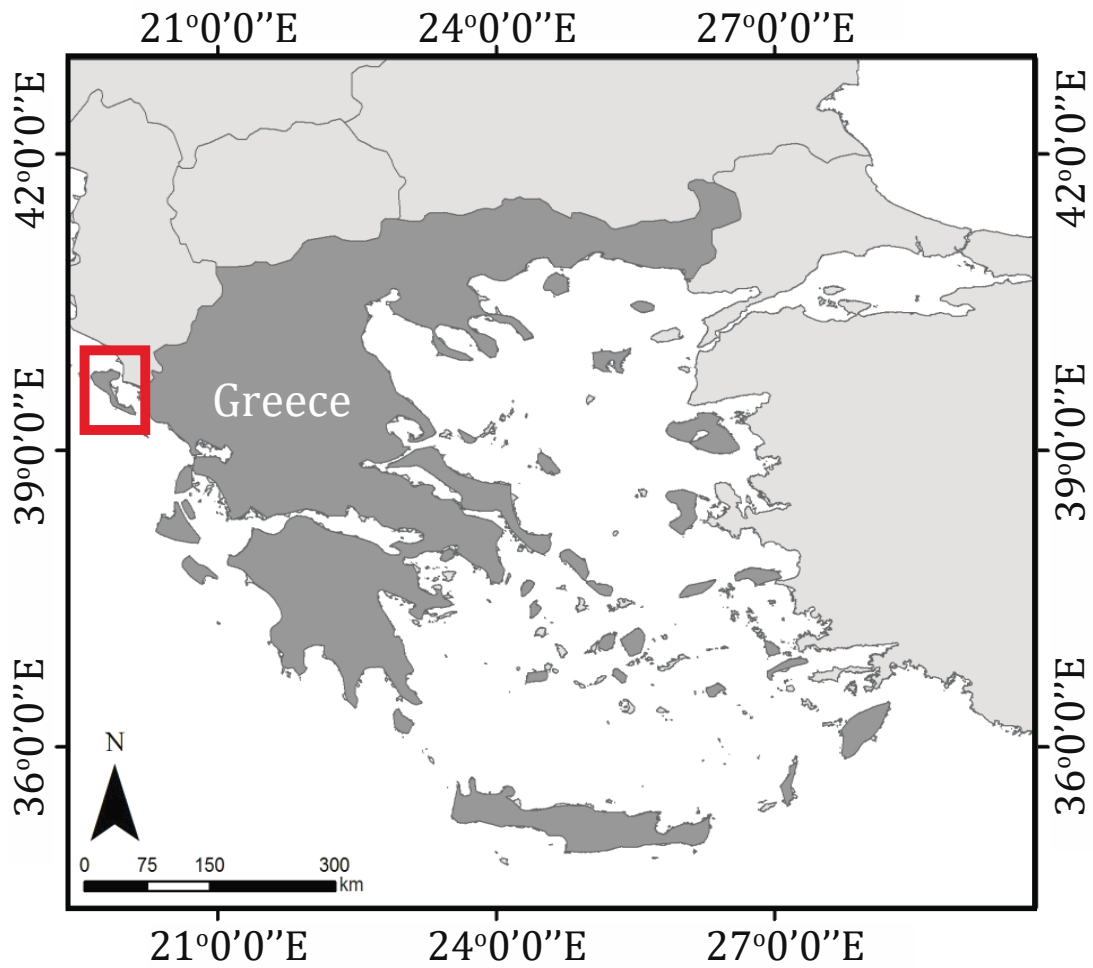

71

72 **Figure S4:** The Ionian Sea (Western Greece) from where the PET samples were used  
 73 for comparison to those sampled from the Saronikos Gulf (ArcMap, ArcGIS 9, V. 9.3;  
 74 [www.esri.com](http://www.esri.com)).

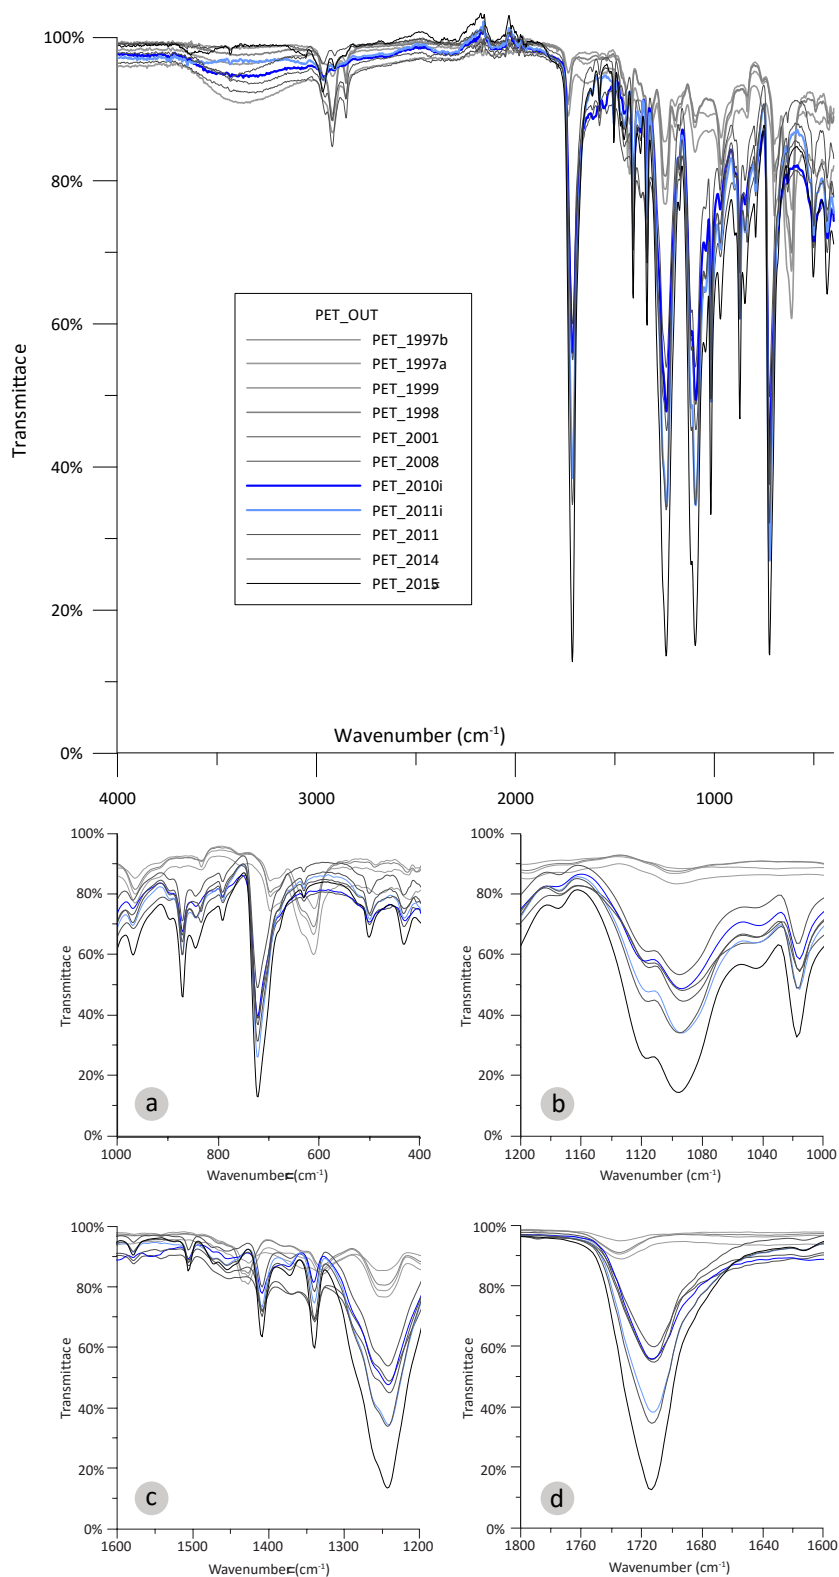

75

76 **Figure S5:** ATR-FTIR comparative spectra of the outer (OUT) surface of the  
 77 degraded PETs from the Saronikos Gulf (1997(a-b), 1998, 1999, 2001, 2008, 2011,  
 78 2014) and the new samples from the Ionian Sea (2010i, 2011i) compared with a virgin  
 79 (V) sample. For better visualization, enlarged excerpts of the ATR-FTIR comparative  
 80 spectra are given at wavenumbers (a) 400-1000, (b) 1000-1200, (c) 1200-1600, (d)  
 81 1600-1800  $\text{cm}^{-1}$ .

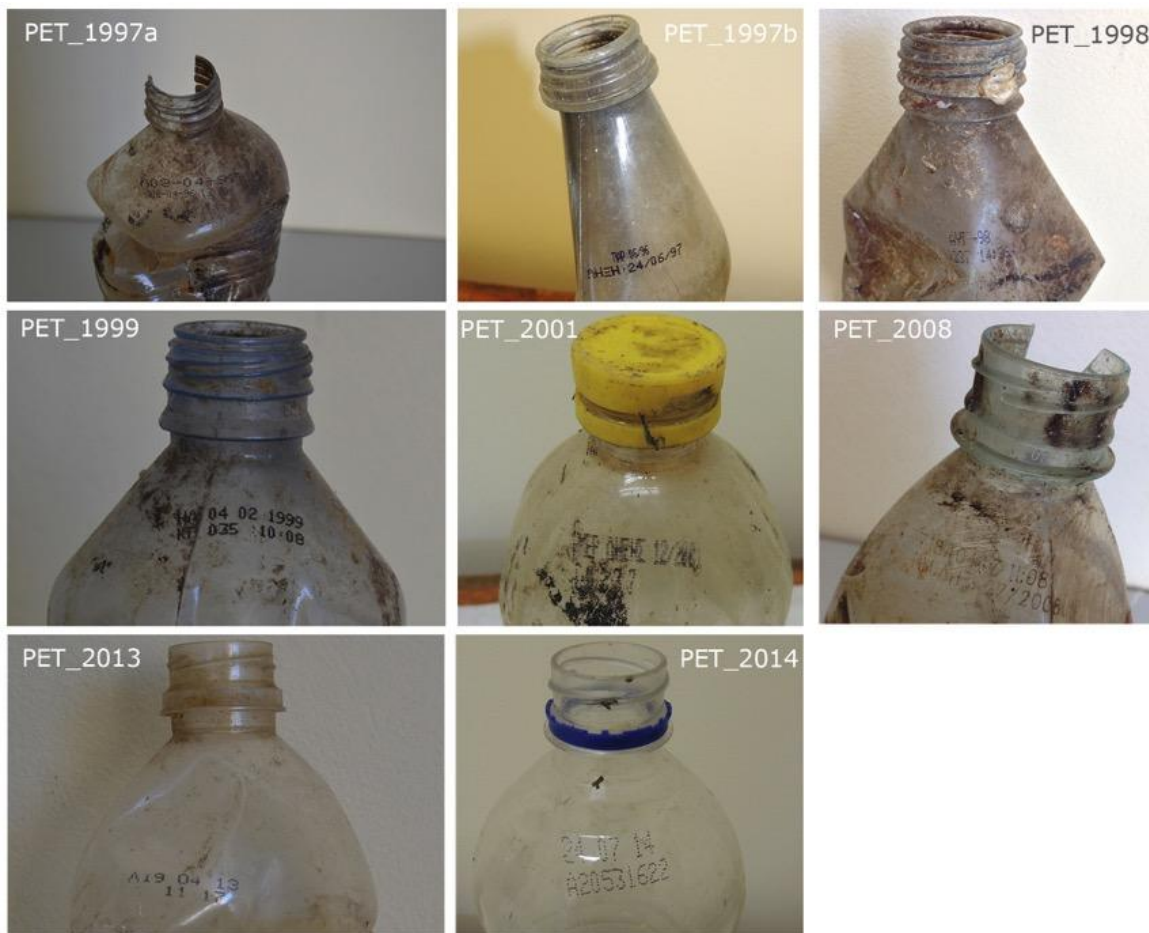

82

83 **Figure S6:** The degraded PETs with a clear indication of their expiration date (1997a,  
84 1997b, 1998, 1999, 2001, 2008, 2013, 2014).
